# Supplementary material
Source: PubMed Central journal article supplement (PMC5909113)
Supplement: Supp_Table1.pdf [file Supp_Table1.pdf]

**Supplementary Table S1.** List of human primers targeting retinal cell types

| <i>Gene</i>   | <i>Forward</i>         | <i>Reverse</i>         | <i>Retinal cell</i> |
|---------------|------------------------|------------------------|---------------------|
| <i>RHO</i>    | gggagaacctgccatcat     | tcgtctccgtcttggacac    | Rod                 |
| <i>OPN1LW</i> | gggacagggctttccatag    | agcacaagcccatttgga     | Cone                |
| <i>OPN1SW</i> | cgccagctgtaacggatact   | ccaataccaatggtccaggt   | Cone                |
| <i>RCVRN</i>  | ctctacgacgtggacggtaa   | caaactggatcagtcgcaga   | Photoreceptors      |
| <i>RPE65</i>  | ctggagcctgaagttctctt   | aagatgggttctgatgggtatg | RPE                 |
| <i>VWF</i>    | aagcagacataccaggagaaag | caggagcaggtgtcgtaaat   | Vasculature         |
| <i>GNB3</i>   | ctgctcacacaggtatctctcc | ccagtctcaatgtcccacaa   | Bipolar             |
| <i>BRN3B</i>  | ctgcaggtcagtcctcaca    | gctcagttgtcgtctctcg    | Ganglion            |
